# Supplementary material for: Synthesis, characterization, and DFT studies of thione and selone Cu(i) complexes with variable coordination geometries
Source: Royal Society of Chemistry journal article supplement (doi:10.1039/c1dt10104h), 2011-01-01
Supplement: c1dt10104h.pdf [file c1dt10104h.pdf]

# Synthesis, Characterization, and DFT Studies of Thione and Selone Cu(I) Complexes with Variable Coordination Geometries

Martin M. Kimani, Craig A. Bayse, and Julia L. Brumaghim\*

## SUPPLEMENTARY INFORMATION

Crystal packing diagrams for  $\text{Cu}_4(\mu\text{-dmise})_4(\mu\text{-I})_2\text{I}_2$  (**1**) and  $\text{CuI}(\text{dmit})_2$  (**3a**) (Fig S1-S2), XRD powder patterns for copper complexes **1**, **2**, **3**, **4**, **5**, **6**, **7**, and **8** (Fig S3-S12), cyclic voltammograms for all copper complexes (Fig S13), and DPV voltammograms for tetrameric complexes **1** and **6** (Figs. S14-S15).

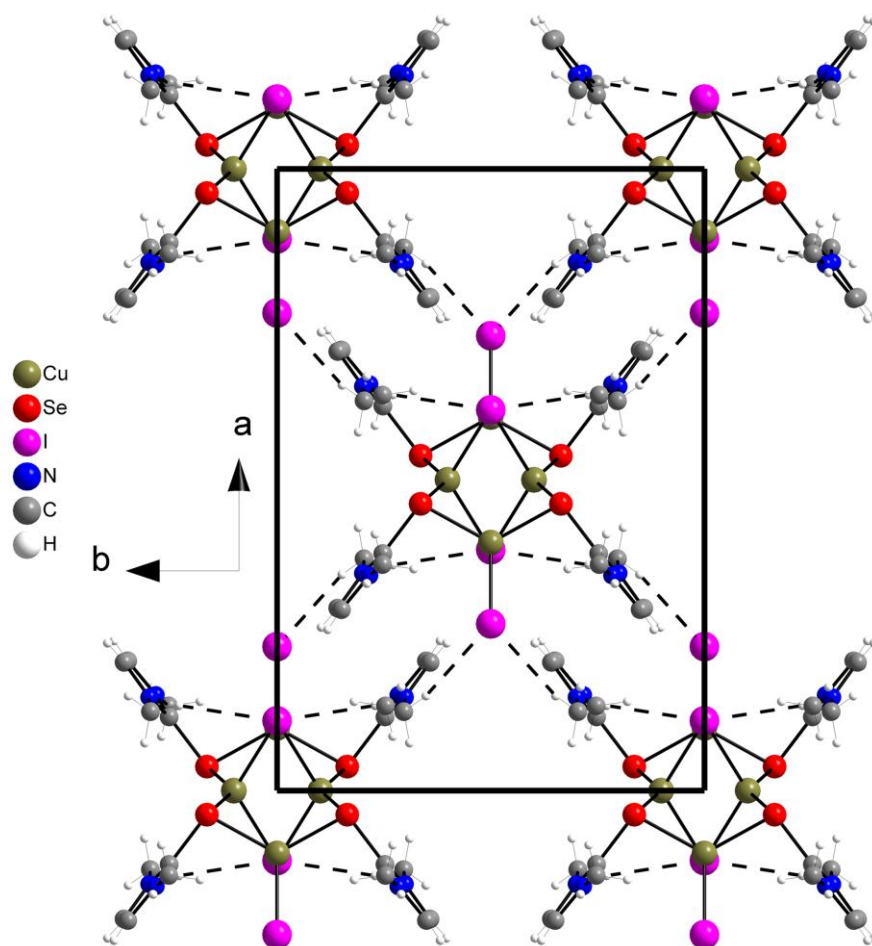

**Figure S1.** Crystal packing diagram of  $\text{Cu}_4(\mu\text{-dmise})_4(\mu\text{-I})_2\text{I}_2$  (**1**) along the  $c$ -axis depicting short contact interactions between Se and H atoms.

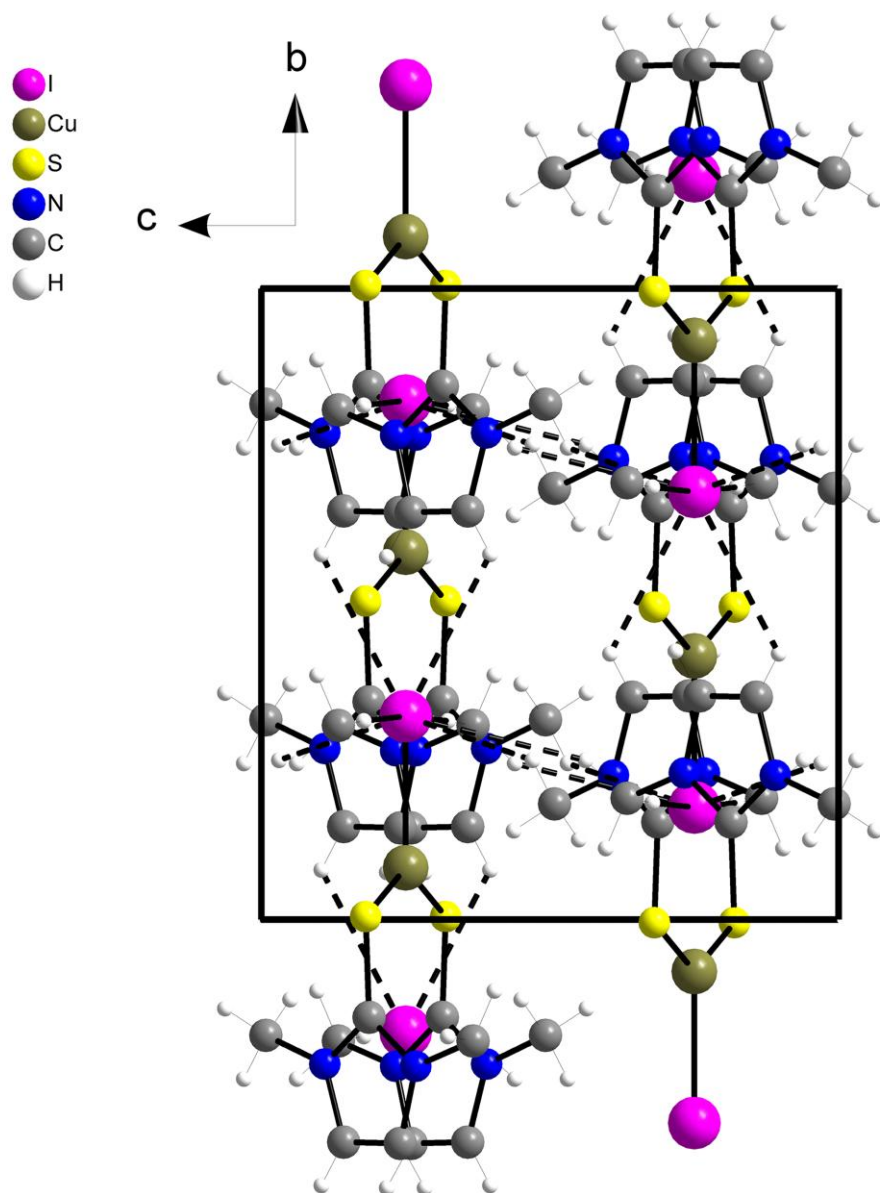

**Figure S2.** Crystal packing diagram of CuI(dmit)<sub>2</sub> (**3a**) along the *a*-axis depicting short contact interactions between Se and H atoms.

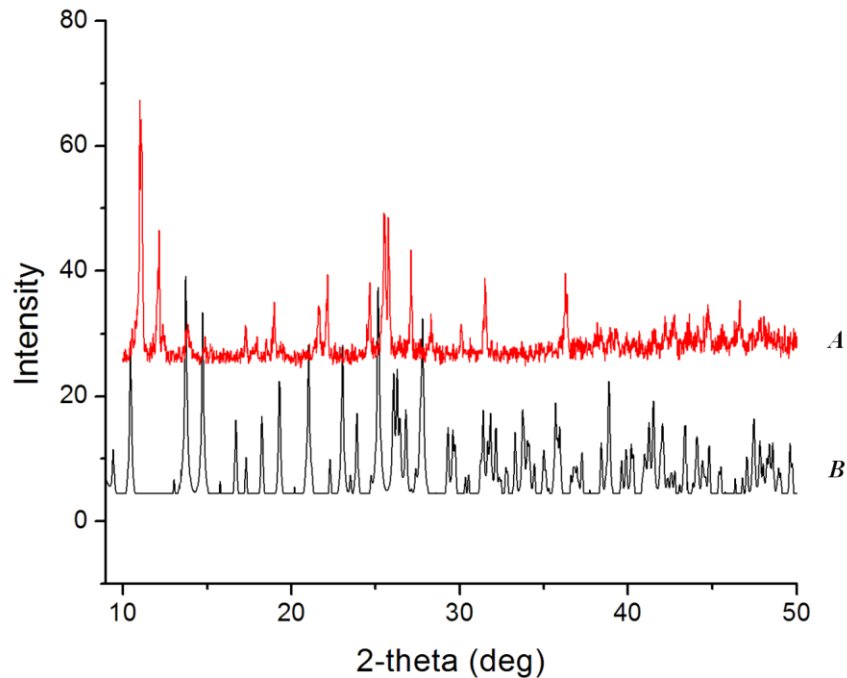

**Figure S3.** Powder X-ray diffraction pattern of A)  $\text{Cu}_4(\mu\text{-dmise})_4(\mu\text{-I})_2\text{I}_2$  (**1**), vs. simulated powder pattern B) for  $\text{Cu}_4(\mu\text{-dmise})_4(\mu\text{-I})_2\text{I}_2$  (**1**).

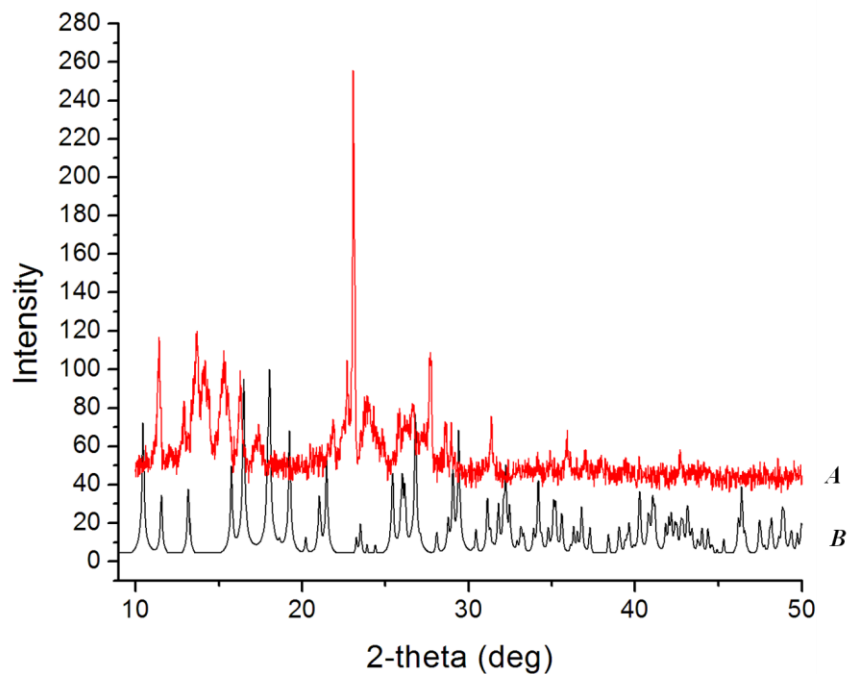

**Figure S4.** Powder X-ray diffraction pattern for A)  $\text{CuI}(\text{dmise})_2$  (**2**), vs. simulated powder pattern for B)  $\text{CuI}(\text{dmise})_2$  (**2**).

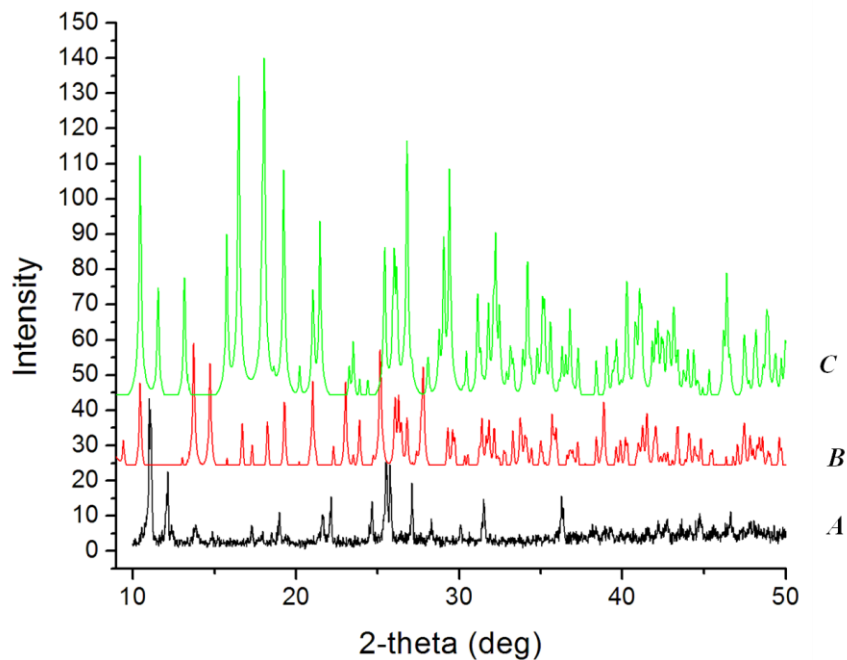

**Figure S5.** Experimental powder X-ray diffraction pattern of A)  $\text{Cu}_4(\mu\text{-dmise})_4(\mu\text{-I})_2\text{I}_2$  (**1**), vs. simulated powder pattern for B)  $\text{Cu}_4(\mu\text{-dmise})_4(\mu\text{-I})_2\text{I}_2$  (**1**), and C)  $\text{CuI}(\text{dmise})_2$  (**2**).

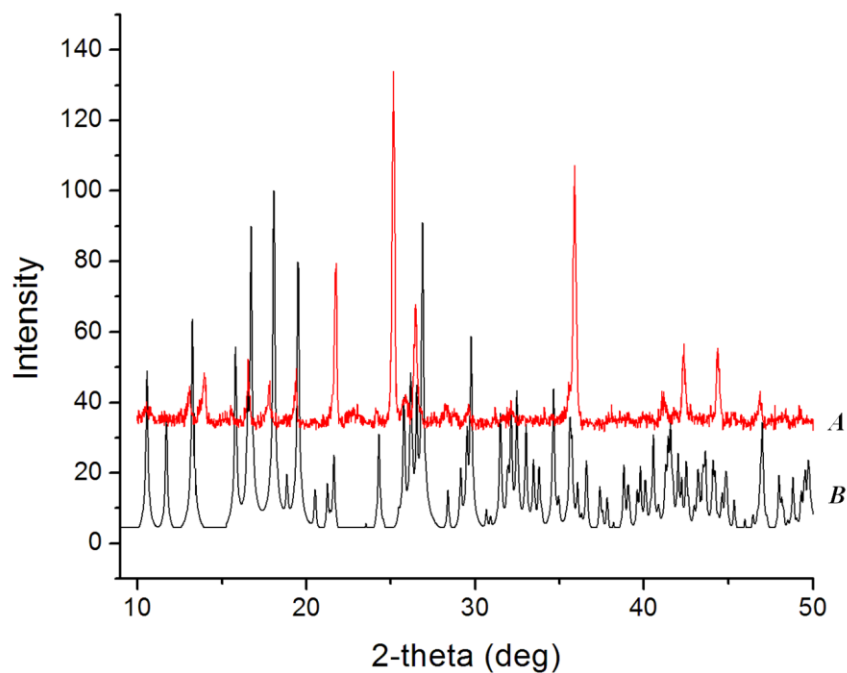

**Figure S6.** Powder X-ray diffraction pattern for A)  $\text{CuI}(\text{dmit})_2$  (**3b**) vs. simulated powder pattern for B)  $\text{CuI}(\text{dmit})_2$  (**3b**).

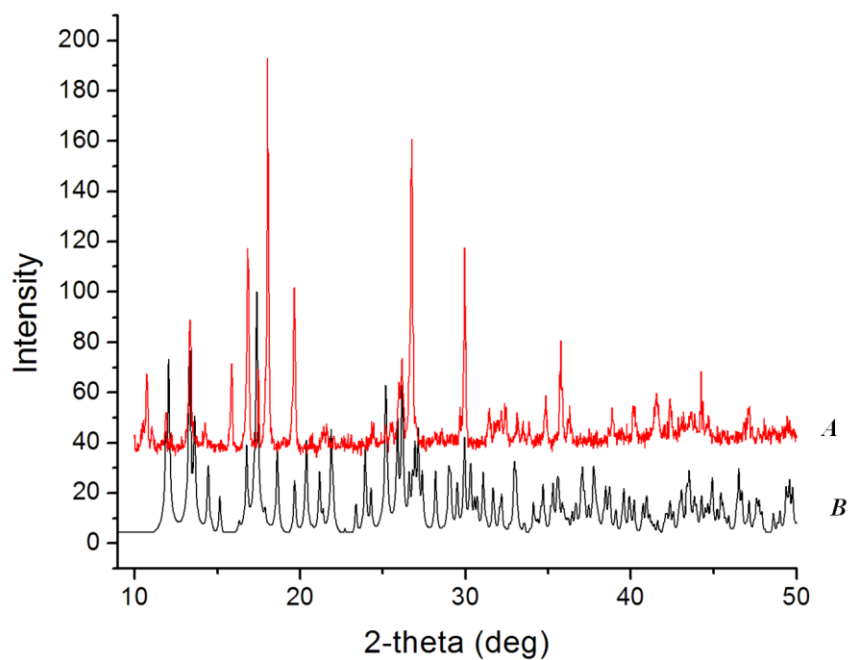

**Figure S7.** Powder X-ray diffraction pattern for **A**) CuI(dmit)<sub>2</sub> (**3a**) vs. simulated powder pattern for **B**) CuI(dmit)<sub>2</sub> (**3a**).

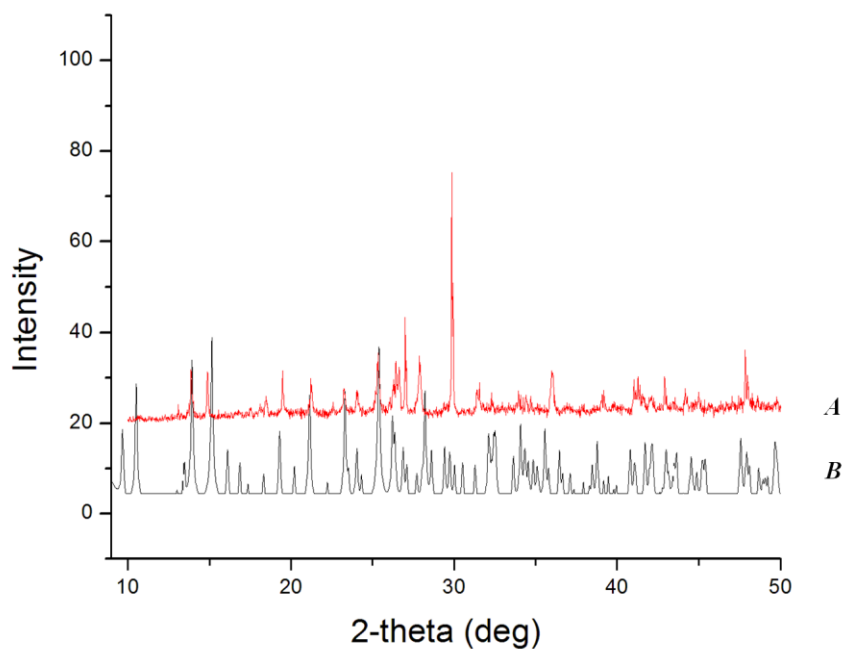

**Figure S8.** Experimental powder x-ray diffraction pattern of **A**) Cu<sub>4</sub>(μ-dmise)<sub>4</sub>(μ-Br)<sub>2</sub>Br<sub>2</sub> (**6**) vs. simulated powder pattern **B**) for Cu<sub>4</sub>(μ-dmise)<sub>4</sub>(μ-Br)<sub>2</sub>Br<sub>2</sub> (**6**).

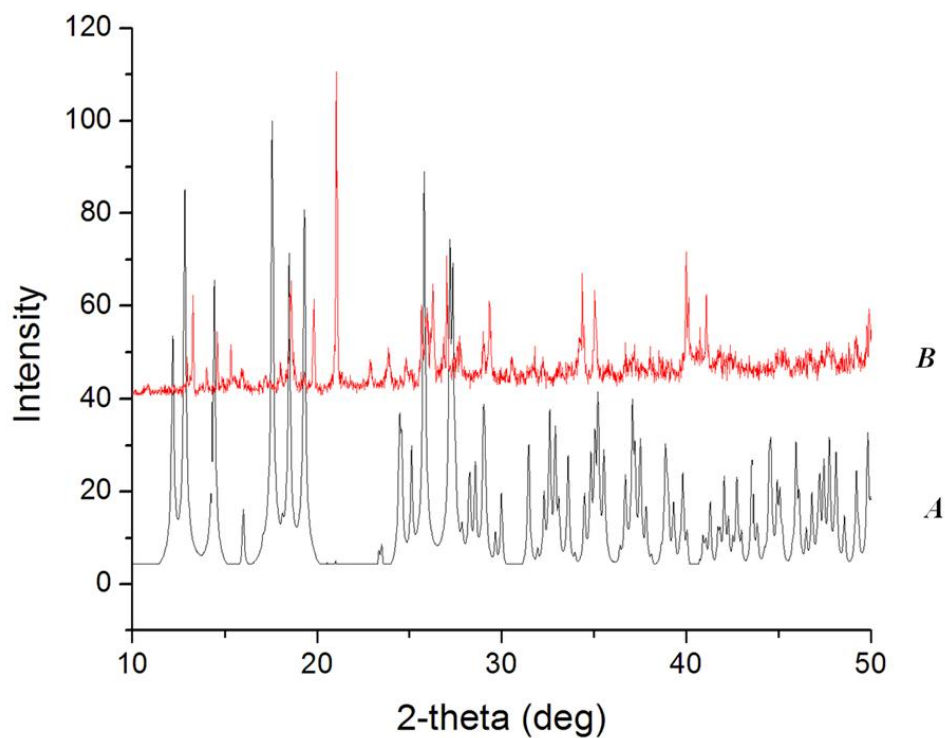

**Figure S9.** Experimental powder x-ray diffraction pattern of B)  $\text{CuBr}(\text{dmise})_2$  (**8**), vs. simulated powder pattern A) for  $\text{CuBr}(\text{dmise})_2$  (**8**).

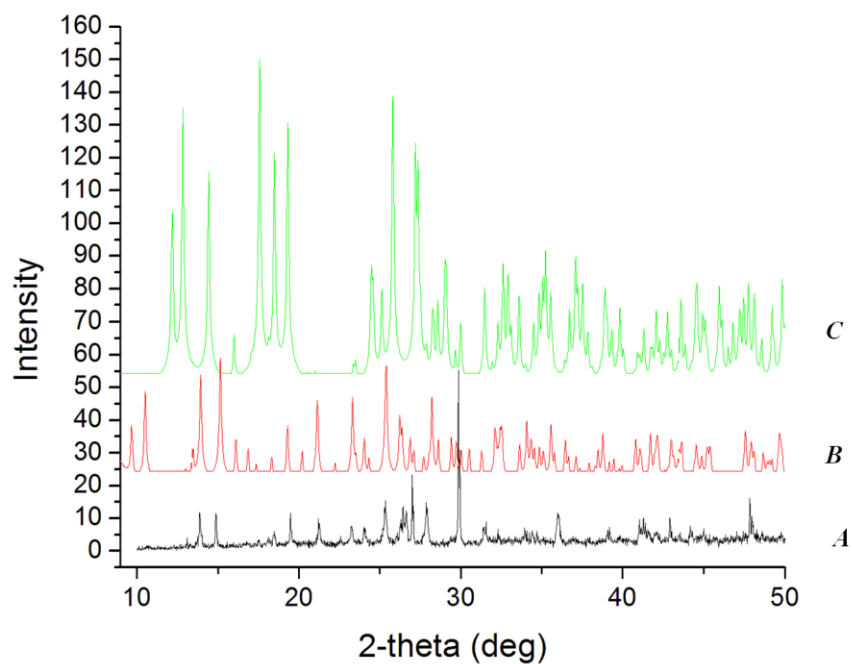

**Figure S10.** Experimental powder x-ray diffraction pattern of A)  $\text{Cu}_4(\mu\text{-dmise})_4(\mu\text{-Br})_2\text{Br}_2$  (**6**), vs. simulated powder pattern B) for  $\text{Cu}_4(\mu\text{-dmise})_4(\mu\text{-Br})_2\text{Br}_2$  (**6**), and C)  $\text{CuBr}(\text{dmise})_2$  (**8**).

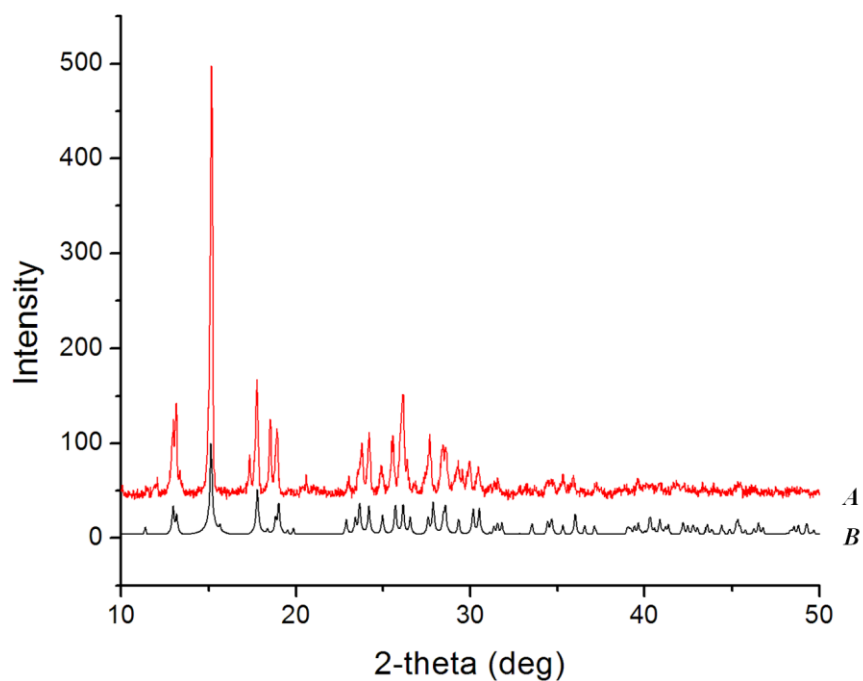

**Figure S11.** Experimental powder X-ray diffraction pattern of A)  $\text{CuCl(dmit)}_2$  (**4**), vs. simulated powder pattern for B)  $\text{CuCl(dmit)}_2$  (**4**).

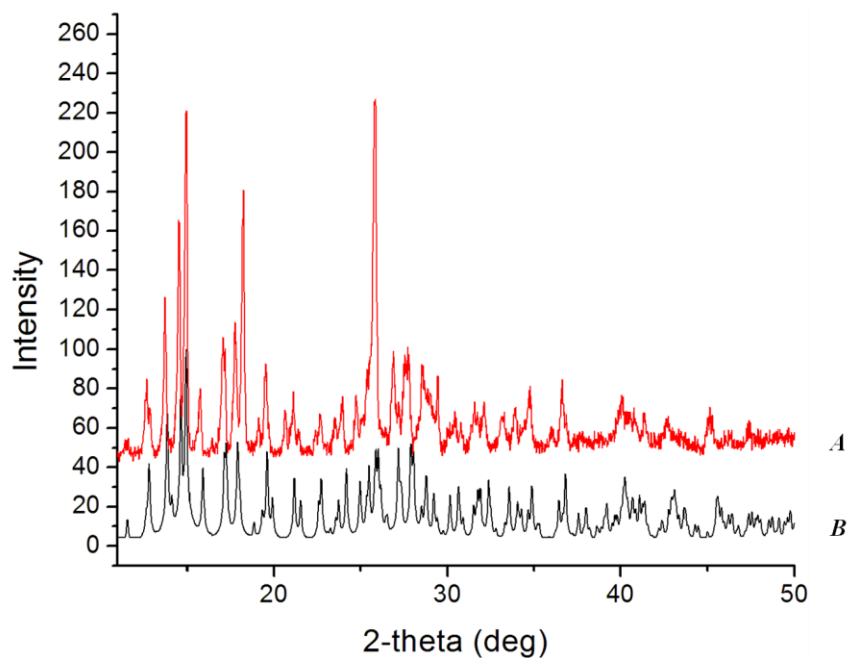

**Figure S12.** Experimental powder X-ray diffraction pattern of A)  $\text{CuCl(dmise)}_2$  (**5**), vs. simulated powder pattern for B)  $\text{CuCl(dmise)}_2$  (**5**).

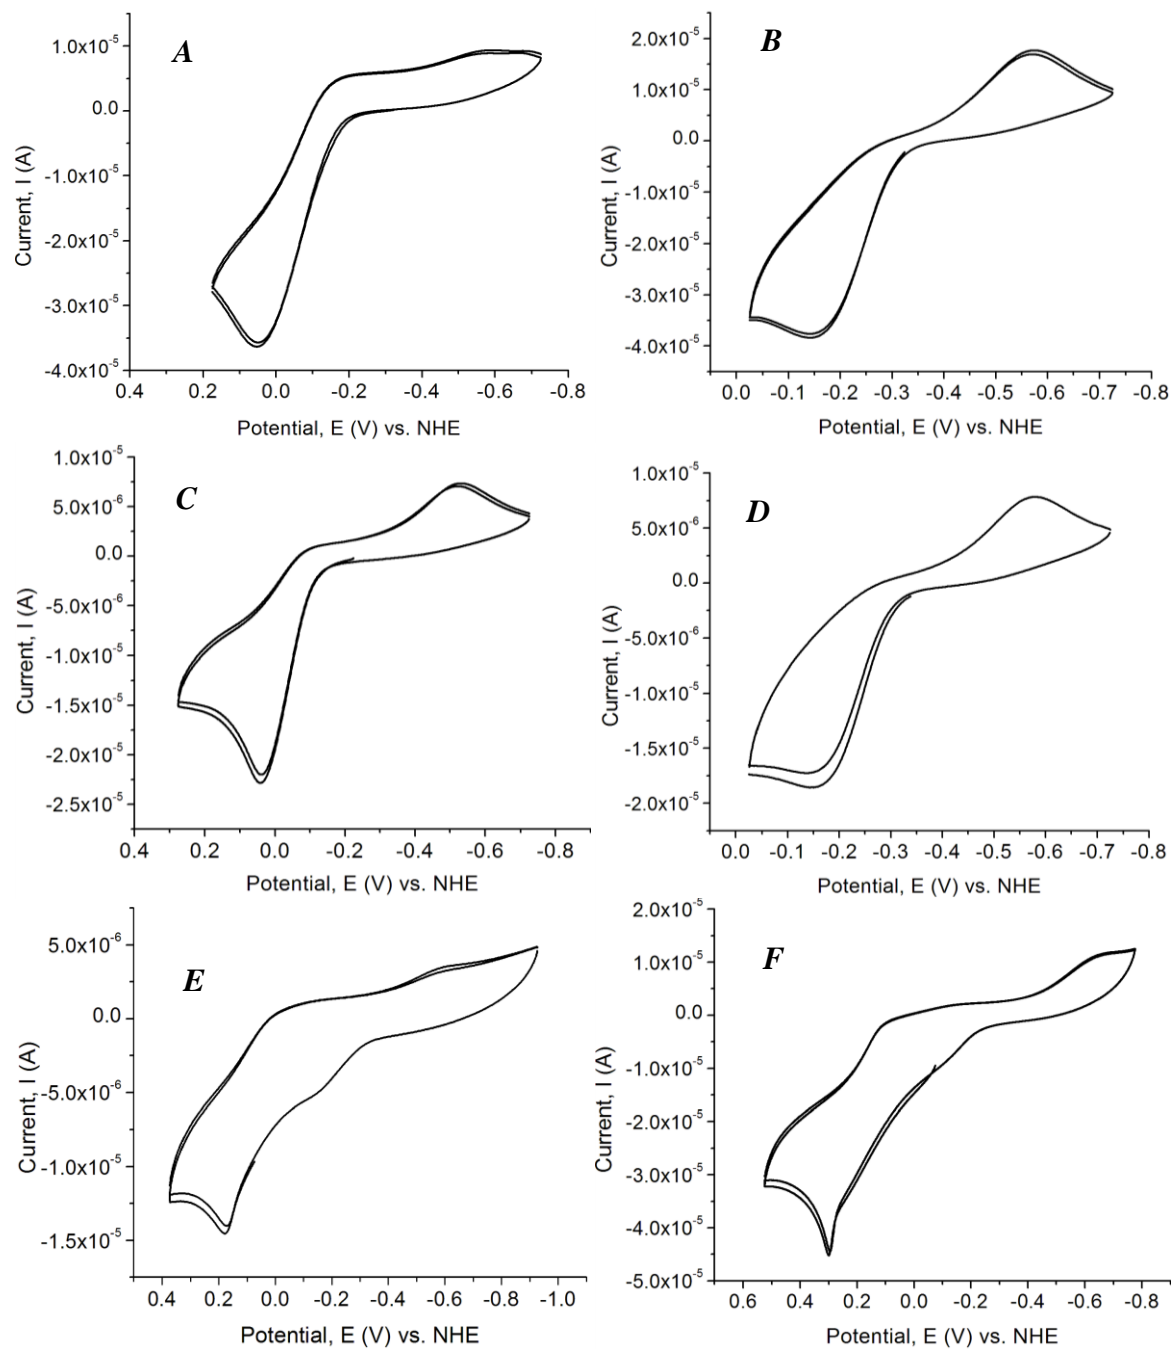

**Figure S13.** Cyclic voltammety scans for A)  $\text{CuCl}(\text{dmit})_2$ , B)  $\text{CuCl}(\text{dmise})_2$ , C)  $\text{CuBr}(\text{dmit})_2$ , D)  $\text{CuBr}(\text{dmise})_2$ , E)  $\text{CuI}(\text{dmit})_2$  **3a**, F)  $\text{CuI}(\text{dmit})_2$  **3b**. All data collected with  $10^{-3}$  M complex in acetonitrile.



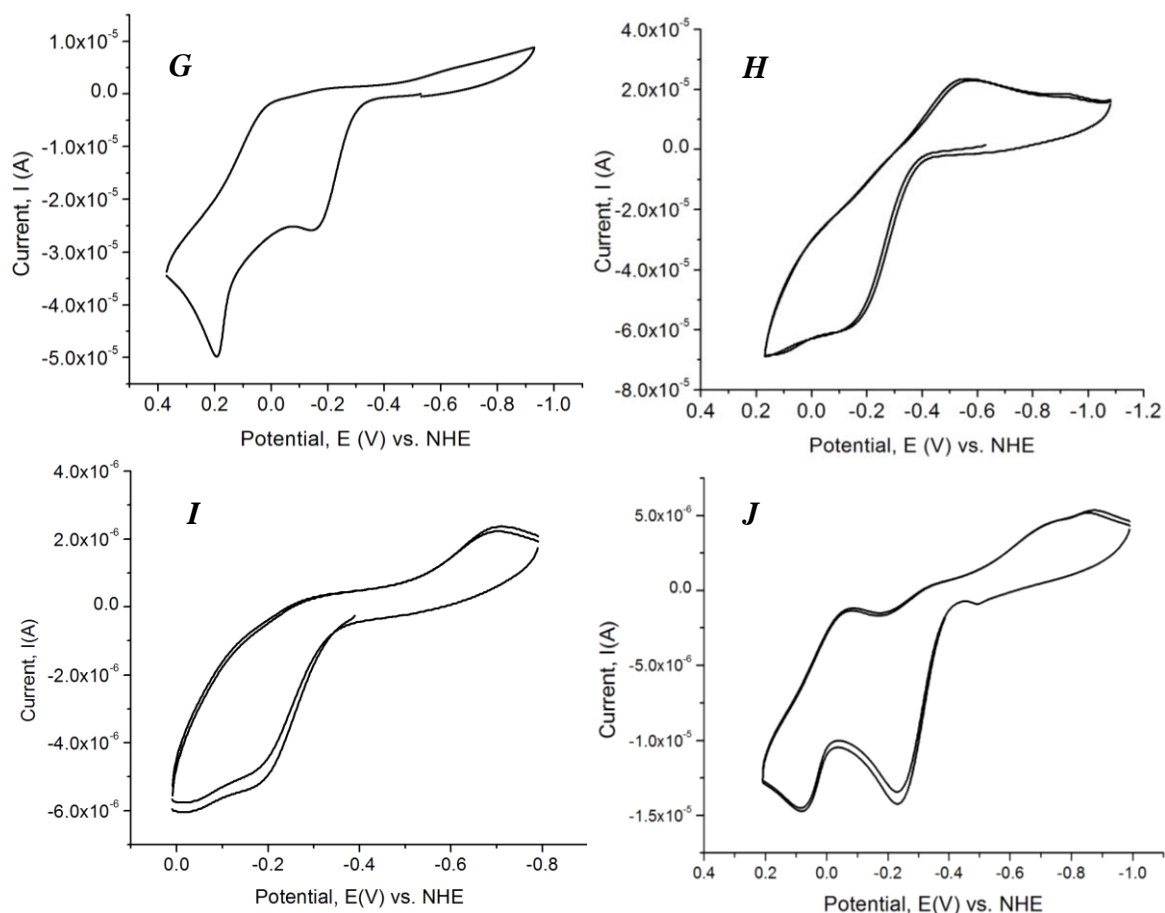

**Figure S13 (continued).** Cyclic voltammograms for G) mixed *trans*- and *cis*-CuI(dmit)<sub>2</sub> (**3a** and **3b**), H) CuI(dmise)<sub>2</sub>, I) Cu<sub>4</sub>(μ-dmise)<sub>4</sub>(μ-Br)<sub>2</sub>Br<sub>2</sub>, J) Cu<sub>4</sub>(μ-dmise)<sub>4</sub>(μ-I)<sub>2</sub>I<sub>2</sub>. All data collected with 10<sup>-3</sup> M complex in acetonitrile.

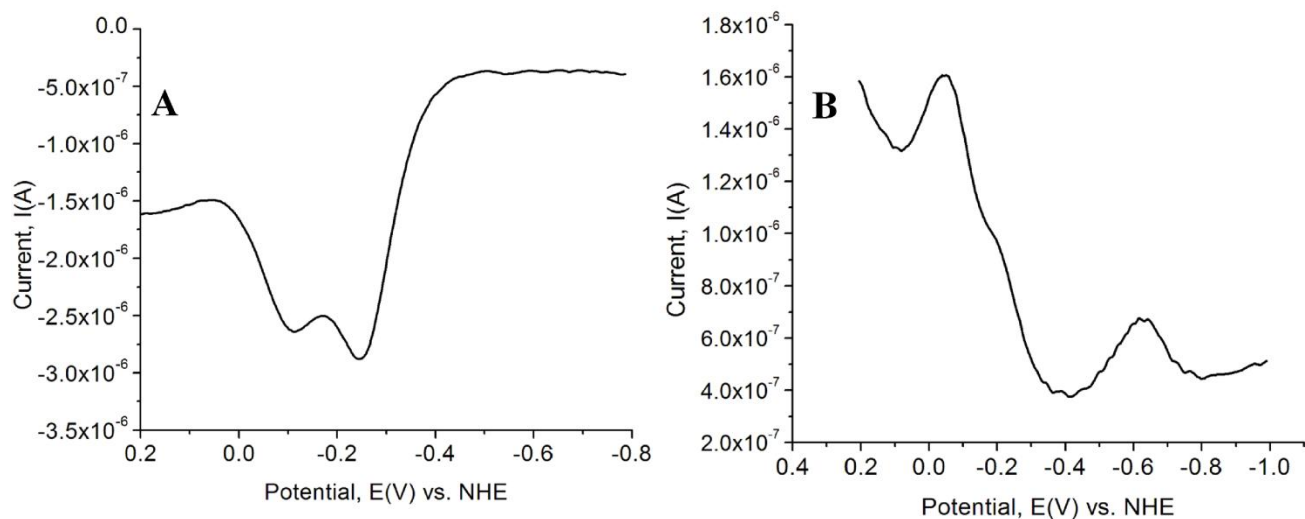

**Figure S14.** Differential pulse voltammograms: A) positive scan of Cu<sub>4</sub>(μ<sub>4</sub>-dmise)(μ-Br)<sub>2</sub>Br<sub>2</sub> (**6**); B) negative scan of Cu<sub>4</sub>(μ<sub>4</sub>-dmise)(μ-Br)<sub>2</sub>Br<sub>2</sub> (**6**). DPV data were collected at a concentration of 1 mM in acetonitrile.

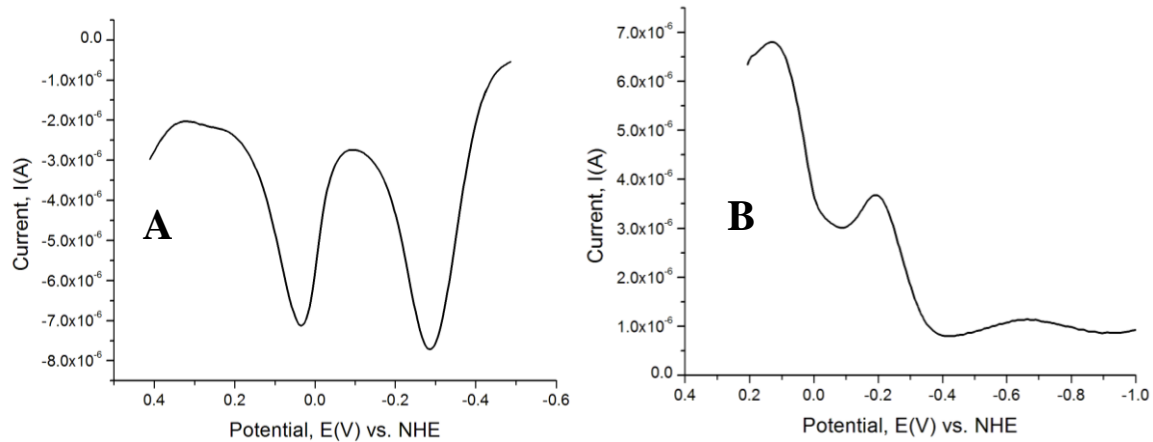

**Figure S15.** Differential pulse voltammograms: A) positive scan of  $\text{Cu}_4(\mu_4\text{-dmise})(\mu\text{-I})_2\text{I}_2$  (**1**); B) negative scan of  $\text{Cu}_4(\mu_4\text{-dmise})(\mu\text{-I})_2\text{I}_2$  (**1**). DPV data were collected at a concentration of 1 mM in acetonitrile.
